# Supplementary material
Source: PubMed Central journal article supplement (PMC2634874)
Supplement: 0811258106_0811258106SI.pdf [file 0811258106_0811258106SI.pdf]

# Supporting Information

Hobbie et al. 10.1073/pnas.0811258106

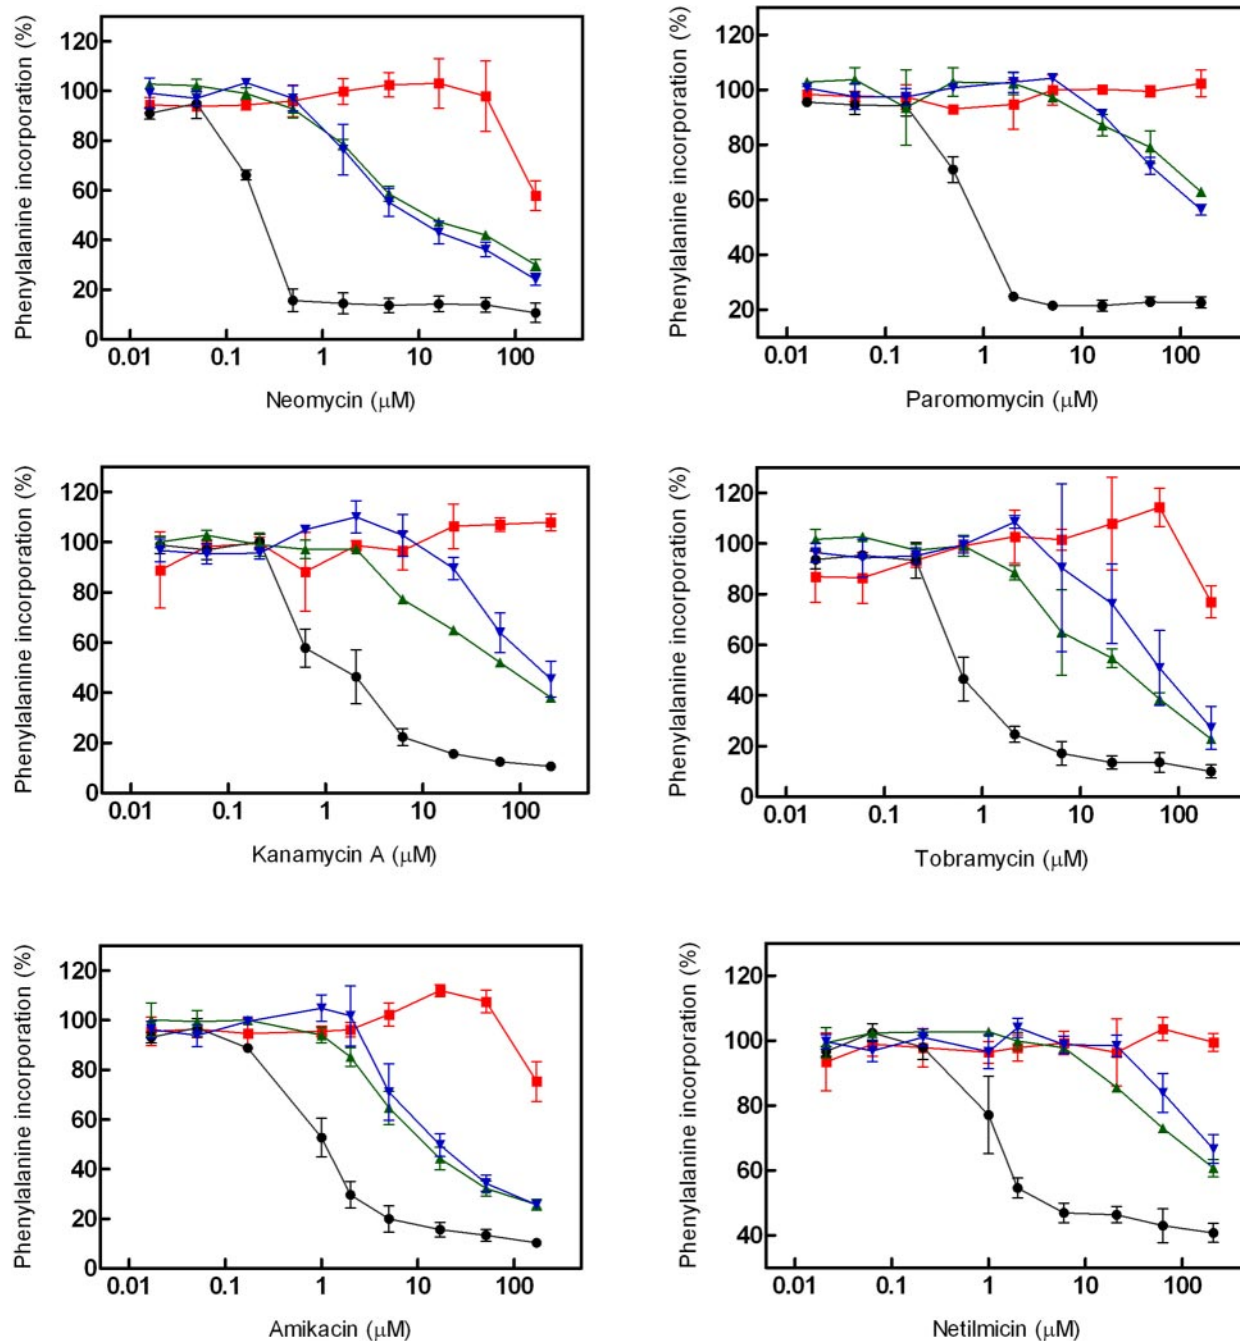

Fig. S1. Aminoglycoside susceptibility of bacterial hybrid ribosomes in AUG(UUU)<sub>12</sub>-directed polypeptide synthesis. Dose-response curves of bacterial (black circles), mitochondrial (red squares), mutant A1555G (green triangles), and mutant C1494T (blue inverted triangles) hybrid ribosomes. Corresponding IC<sub>50</sub> values are given in Table 2.

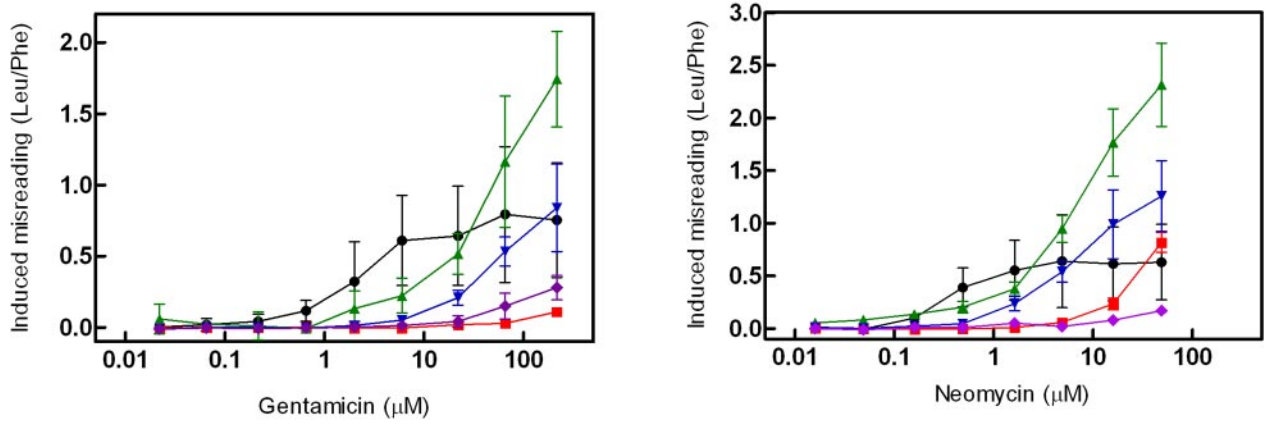

**Fig. S2.** Aminoglycoside-induced miscoding relative to a drug-free control in a *M. smegmatis* G1491C mutant in comparison to mutant mitochondrial decoding sites. Dose-response curves of *M. smegmatis* G1491C (purple diamonds), mitochondrial (red squares), mutant A1555G (green triangles), and mutant C1494T (blue inverted triangles) hybrid ribosomes. Bacterial wild-type ribosomes (black circles) are included for comparison.

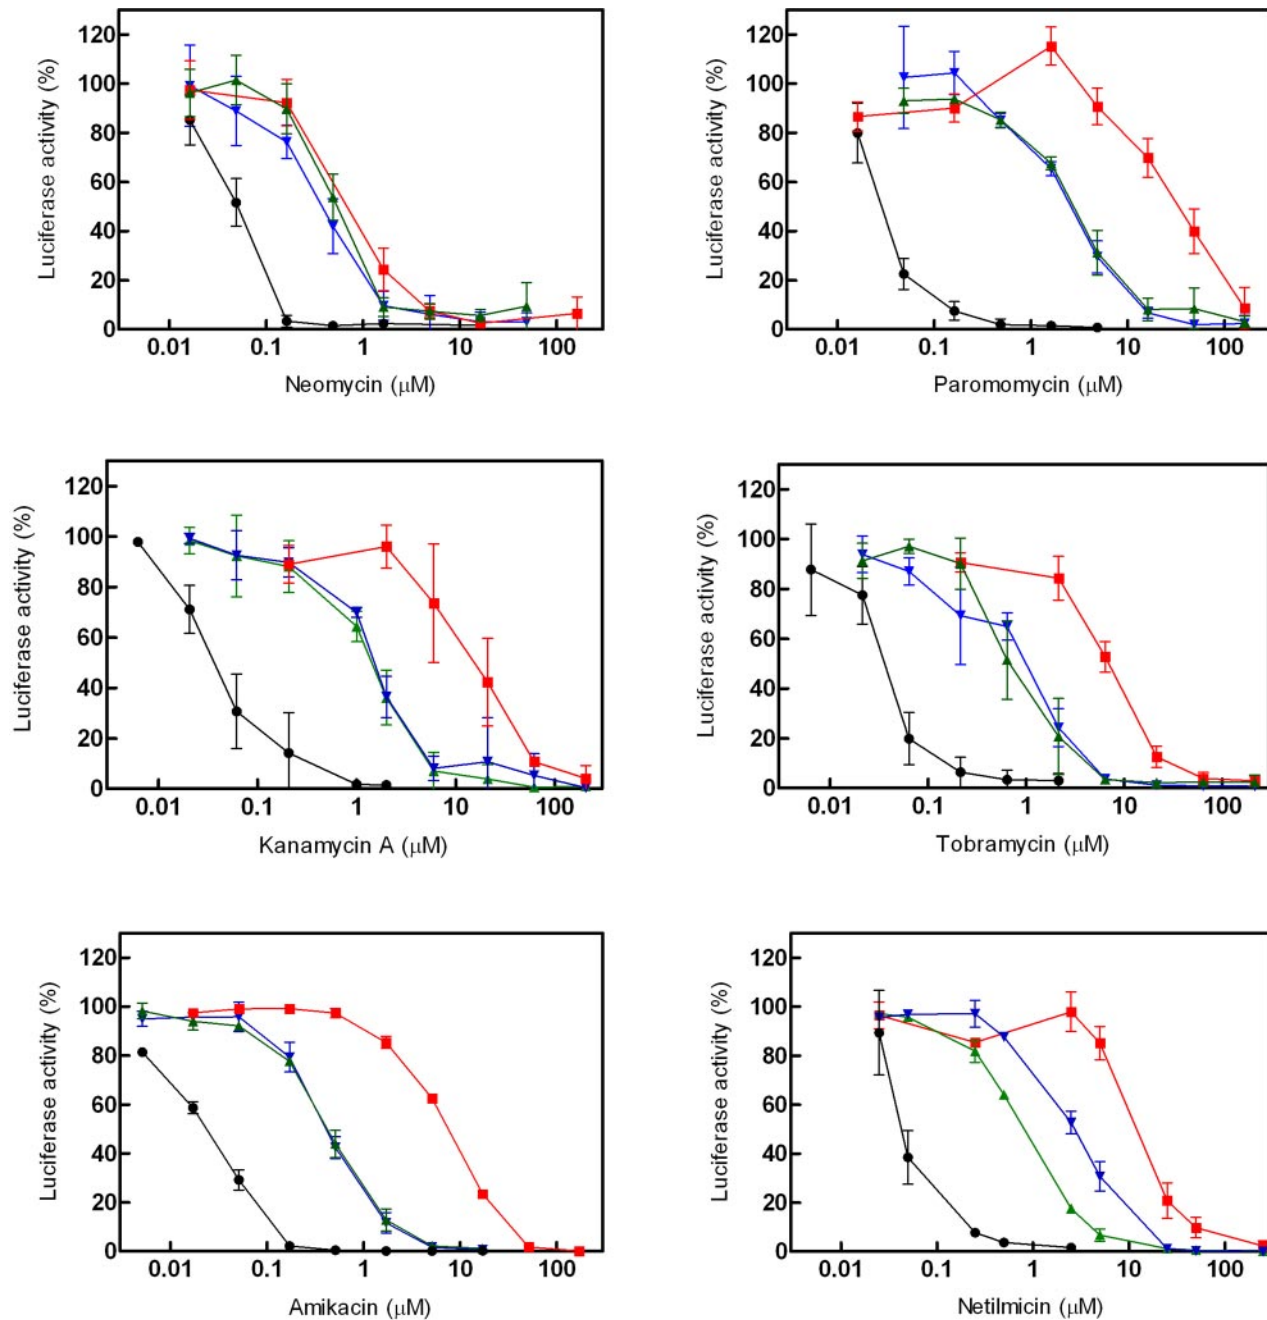

**Fig. S3.** Aminoglycoside-induced inhibition of luciferase synthesis. Dose-response curves of bacterial (black circles), mitochondrial (red squares), mutant A1555G (green triangles), and mutant C1494T (blue inverted triangles) hybrid ribosomes. Corresponding  $\text{IC}_{50}$  values are given in Table 3.

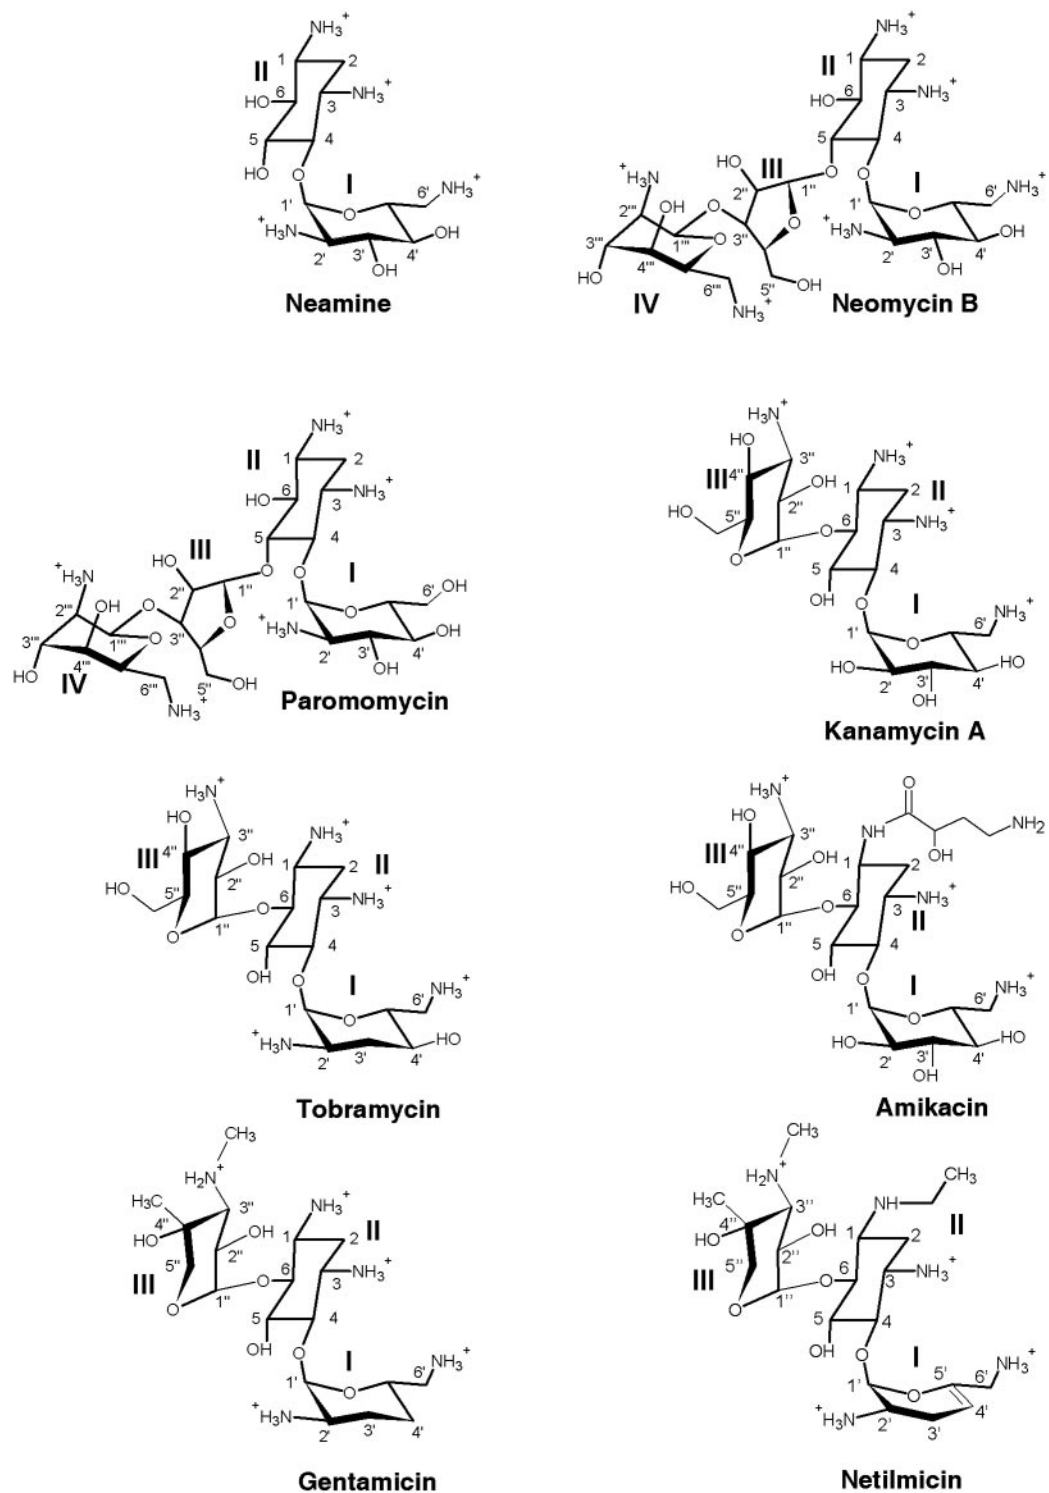

Fig. S4. Chemical structures of 2-deoxystreptamine antibiotics used in this study.

**Table S1. Minimal inhibitory concentrations ( $\mu\text{g/ml}$ ) against *M. smegmatis* G1491C mutant in comparison to mutant mitochondrial hybrids**

|             | A-site rRNA         |                           |                  |                  |                            |
|-------------|---------------------|---------------------------|------------------|------------------|----------------------------|
|             | <i>M. smegmatis</i> | Mitochondrial (mt) hybrid | mt A1555G hybrid | mt C1494T hybrid | <i>M. smegmatis</i> G1491C |
| Neomycin B  | 0.5                 | 16–32                     | 8                | 8                | 16                         |
| Paromomycin | 1                   | > 1,024                   | 256–512          | 256–512          | 512                        |
| Kanamycin A | 1                   | 256–512                   | 16–32            | 16               | 16–32                      |
| Tobramycin  | 1                   | 128                       | 16               | 16               | 16                         |
| Amikacin    | 0.5                 | 32–64                     | 2–4              | 2–4              | 4                          |
| Gentamicin  | 1                   | 64–128                    | 16–32            | 16–32            | 16–32                      |
| Netilmicin  | 2                   | 512–1,024                 | 64               | 64–128           | 128                        |

**Table S2. Aminoglycoside susceptibility of the mitochondrial versus the cytosolic decoding site**

|             | MIC ( $\mu\text{g/ml}$ ) |                  |
|-------------|--------------------------|------------------|
|             | Mitochondrial hybrid     | Cytosolic hybrid |
| Neomycin B  | 16–32                    | > 1,024          |
| Kanamycin A | 256–512                  | > 1,024          |
| Tobramycin  | 128                      | 1,024            |
| Amikacin    | 32–64                    | 512–1,024        |
| Gentamicin  | 64–128                   | > 1,024          |
| Netilmicin  | 512–1,024                | > 1,024          |
